# Supplementary material
Source: PubMed Central journal article supplement (PMC3711243)
Supplement: NIHMS254899-supplement-Supp_Data.pdf [file NIHMS254899-supplement-Supp_Data.pdf]

1

## SUPPLEMENTARY ONLINE CONTENT

2

3 Bartlett JR, et al. Genetic modifiers of liver disease in cystic fibrosis. Submitted to *JAMA*, 2009.

4

5 **Supplementary Information:**

6 Supplemental Methods

7 Supplemental Results

8 Supplemental Discussion

9 Supplemental Reference List

10 Supplemental Figure Legends

11 eTables 1 through 6

12 eFigures 1 and 2

13

14 **SUPPLEMENTAL - METHODS**

15 **Patients - Initial (first) study**

16 The CFLD patients were ascertained from 22 CF Centers from 10 countries: Australia (n=8  
17 patients), Canada (n=17 patients), Czech Republic (n=17 patients), Germany (n=3 patients), Italy  
18 (n=28 patients), Netherlands (n=1 patient), Scotland (n=2 patients), Slovakia (n=4 patients),  
19 Turkey (n=4 patients), and U.S. (n=44 patients). Of these 128 subjects, 4 were excluded due to  
20 the CFLD diagnosis not being made until after the age of 30 years. The 843 CF (control) subjects  
21 without CFLD were ascertained from two countries (Canada, 84 patients from 32 Centers, and  
22 U.S., 759 patients from 42 Centers). By age 15 years, 83.7% of CF patients who developed  
23 CFLD were already diagnosed; therefore, CF control subjects younger than 15 years of age were  
24 excluded.

25

26 **Patients - Replication (second) study**

27 The CFLD patients were ascertained from 35 CF Centers from 10 countries: Argentina (n=5  
28 patients), Australia (n=5 patients), Canada (n=24 patients), Chile (n=1 patient), France (n=9  
29 patients), Ireland (n=8 patients), Israel (n=7 patients), Italy (n=14 patients), United Kingdom (n=4  
30 patients) and U.S. (n=62 patients). Of these 139 subjects, 3 were excluded due to the diagnosis  
31 of CFLD not being made until after the age of 30 years. The 1088 CF (control) subjects without  
32 CFLD were ascertained from five countries (Canada, 391 patients from 32 Centers; Czech  
33 Republic, 30 patients; Ireland, 6 patients; Italy, 71 patients; and U.S., 590 patients from 54  
34 Centers).

35

36 **Enrollment criteria**

37 Pertinent clinical documentation was reviewed independently by two hepatologists (P.R.D.,  
38 S.C.L.) to ensure inclusion and exclusion criteria were met for CF liver disease (i.e. case report  
39 forms, radiology reports, endoscopy reports, physical examinations and clinical notes containing  
40 documentation of CFLD). When there was not consensus for any patient, these two reviewers  
41 met and additional information was requested if it would clarify the diagnosis of CFLD. No patient

42 was excluded because of race or ethnic background, which were self-reported. A total of 47  
43 subjects were enrolled post liver transplant (26 in initial study, 21.0%; 21 in replication study,  
44 15.4%). For these patients, source documentation for CFLD criteria was required from medical  
45 records prior to liver transplant. Exclusion criteria for CFLD were alcohol abuse, biliary atresia,  
46 liver cancer, portal vein thrombosis, clinically significant viral hepatitis, use of parenteral nutrition,  
47 and Wilson disease.

48

#### 49 **Distribution of the age of diagnosis of CFLD**

50 The average first documentation of portal hypertension, i.e. diagnosis of CFLD, in the population  
51 of liver disease subjects was 10.6 ( $\pm$  5.4) years. Males had an earlier age of diagnosis of CFLD  
52 than females for all subjects (males=8.5 yrs, females=10.5 years;  $P=0.007$ ) and self-reported  
53 Caucasians (males=9.7 yrs, females=11.5 yrs;  $P=0.027$ ). The diagnosis of CFLD was first  
54 established after the age of 30 in 7 subjects (ages of 32, 33, 35, 35, 40, 43, and 47 years), which  
55 is  $\geq$  4 SD from the mean of the normal distribution; therefore, these patients were excluded from  
56 the genetic analyses (4 patients from the initial study, and 3 patients from the replication study as  
57 mentioned above). Of the 260 CFLD patients, data was obtained to define/determine the year of  
58 CF diagnosis in 213 of the patients.

59

#### 60 ***CFTR* genotypes**

61 For the initial study, the majority of the 124 patients with CFLD had 2 identified pancreatic  
62 insufficient (PI) mutations (80.7%,  $n=100$ ), most of which were DF508/DF508 (56.5%,  $n=70$ ). In  
63 addition, 30 subjects carried biallelic PI mutations, including: DF508/G542X ( $n=4$ ), DF508/1717-  
64 1G>A ( $n=3$ ), DF508/G551D ( $n=2$ ), DF508/R553X ( $n=2$ ), and DF508/N1303K ( $n=2$ ) and other  
65 combinations of 2 PI alleles ( $n=17$ ). A few subjects had either one ( $n=16$ ) or two ( $n=3$ ) PI alleles  
66 without an identified *CFTR* mutation. Only 5 subjects (4%) had one "pancreatic sufficient" (PS) or  
67 variable PS allele, including G85E ( $n=2$ ), R347P ( $n=2$ ) and A455E ( $n=1$ ).

68 The majority of the CF subjects in the initial control population was ascertained from the  
69 GMS Lung Study patient population<sup>1</sup>, which accounts for the high percentage of DF508

70 homozygotes (92.6%). In addition, 55 subjects had biallelic PI mutations, including  
71 DF508/N1303K (n=10), DF508/G542X (n=6), DF508/G551D (n=5), DF508/621+1G>T (n=3),  
72 W1282X/W1282X (n=3), DF508/DI507 (n=2), DF508/3659delC (n=2) and other combinations of 2  
73 PI alleles (n=24). Only 7 subjects did not have an identified *CFTR* mutation on one allele.

74 In the replication study, *CFTR* genotypes in CFLD subjects were similar to those in the  
75 initial study. The majority of the 136 patients with CFLD had 2 PI mutations (85.4%, n=116), and  
76 many were DF508/DF508 (45.6%, n=62). In addition 54 subjects had biallelic mutations,  
77 including DF508/G542X (n=8), DF508/G551D (n=5), DF058/621+1G>T (n=4), DF508/1717-1G>A  
78 (n=3), DF508/N1303K (n=3), DF508/R553X (n=3), DF508/R560T (n=2), DF508/W1282X (n=2),  
79 and W1282Z/W1282X (n=2), plus 22 other biallelic mutations. A few subjects had either one  
80 (n=14) or two (n=2) alleles without an identified *CFTR* mutation. Only 4 subjects (3%) had PS or  
81 variable PS mutations, including G85E (n=1), R347P (n=1), A455E (n=1), or 3849+10kbC>T  
82 (n=1).

83 For the 1088 replication control CF subjects without liver disease, the majority had 2 PI  
84 mutations (93.5%), most of which were DF508/DF508 (62.5%, n=685). In addition to the DF508  
85 homozygotes, 332 subjects had biallelic PI mutations, including DF508/G551D (n=54),  
86 DF508/G542X (n=52), DF508/N1303K (n=35), DF508/621+1G>T (n=23), DF508/1717-1G>A  
87 (n=14), DF508/W1282X (n=14), DF508/R553X (n=12), and DF508/R1162X (n=11); the remaining  
88 117 subjects had genotypes that occurred in  $\leq 10$  patients. The replication control population had  
89 56 subjects with either one (n=44) or two (n=12) alleles with an unidentified *CFTR* mutation.  
90 Finally, 15 subjects had PS (or variable PS) mutations: A445E (n=5), G85E (n=4),  
91 3849+10kbC>T (n=2), R334W (n=1), R117H (n=1), R347P (n=1), and 2789+5G>A (n=1).

92

### 93 **Data collection**

94 Only initials and dates of birth for the CFLD subjects were available on source documents (other  
95 identifying information was blacked out). Clinical data that were provided on standard case report  
96 forms included: self-reported race/ethnicity, pancreatic exocrine status, medical history, results of  
97 physical examination, laboratory blood work values, and abdominal radiology reports. In addition,

98 we requested the following procedure reports if available: liver explant pathology (from liver  
99 transplant), liver biopsy, endoscopy and colonoscopy. Clinical information was double-entered  
100 into the database to ensure accuracy.

101

## 102 **DNA extraction and genotyping**

103 For the majority of CFLD subjects enrolled in the study, blood was collected by venipuncture and  
104 DNA was extracted from peripheral blood leukocytes from one or two tubes of blood using  
105 standard protocols.<sup>2</sup> The remaining tubes were used for lymphocyte isolation, then further  
106 subjected to EBV-mediated transformation to establish immortal cell lines. DNA was isolated  
107 from the lymphoblastoid cell lines using 'Epicentre MasterPure Complete DNA and RNA  
108 purification kit' (Epicentre, Madison, WI). For a few CFLD subjects, genomic DNA was provided  
109 by the CF center enrolling the patient.

110

### 111 *Initial study – genotyping*

112 Mutations in *SERPINA1* (Z and S allele) were tested as described<sup>3</sup> or by direct sequencing.  
113 *MBL2* promoter and structural variants were determined by direct sequencing or microsphere-  
114 based genotyping (Luminex-100). *MBL2* structural (null) variants (B, C and D) were combined to  
115 construct the O/O genotype. *ACE* (D or I deletion), *GSTP1* (rs947894) and *TGFB1* (rs1800469,  
116 rs1982073, and rs1800471) were genotyped by direct sequencing or by Illumina BeadArray™  
117 technology (San Diego, CA). For the alleles that were sequenced (*SERPINA1* Z; *MBL2* B, C and  
118 D “null” alleles), PCR products were purified either using 'QIAquick PCR purification kit' (Qiagen,  
119 Valencia, CA) or ExoSAP-IT (USB, Cleveland, OH) as per manufacturer's instructions. The  
120 purified PCR products were sequenced using 'Big Dye Terminator Cycle Sequencing Kit' and run  
121 on ABI PRISM 3100, 3130 or 310 according to the manufacturer's protocol (Applied Biosystems,  
122 Foster City, CA). *MBL2* structural (“null”) variants (B, C, D) were combined to construct the O/O  
123 (null/null) genotype. The low-expression promoter variant (X) was combined with the normal  
124 structural (A) sequence to construct the XA allele, since XA produces low levels of *MBL2* protein  
125 (Crosdale et al., 2000).<sup>4</sup> The assays performed by Illumina (*SERPINA1* S; *GSTP1*; *MBL2*

126 promoter variant, Y and X, which are the normal and low expression variants, respectively;  
127 *TGFB1*) used an established BeadArray (Illumina) technology<sup>5,6</sup> or the variants were sequenced  
128 directly by our lab. Other genetic variants (*ACE* and *CFTR*) were tested using standard  
129 methods.<sup>7-9</sup> For *ACE*, genotyping of the insertion (I) or deletion (D) polymorphism of the Alu  
130 repeat sequence in intron 16 of the *ACE* gene was performed by the method previously  
131 reported.<sup>7</sup> Briefly PCR products were run on a 3% agarose gel (NuSieve, Cambrex Bio Science  
132 Rockland Inc., Rockland, ME) and DNA fragments of 490 bp (insertion) and 190 bp (deletion)  
133 were visualized by staining with ethidium bromide. For *SERPINA1*, *ACE*, and *MBL2*, PCR was  
134 performed in 25 µl reaction volume containing 100 ng genomic DNA, 0.4 µM each forward and  
135 reverse primers, 1X buffer (1 mM (NH<sub>4</sub>)<sub>2</sub>SO<sub>4</sub>, 67 mM Tris-HCl (pH8.8), 0.01% Tween-20), 1-3 mM  
136 MgCl<sub>2</sub>, 100-200 µM dNTP mix and 0.75-1.25 units of AmpliTaq DNA polymerase (Perkin Elmer,  
137 Foster City, CA). PCR cycling conditions comprised of initial denaturation at 94°C for 5 minutes  
138 followed by 30-35 amplification cycles (94°C for 30-60 s, 55-60°C for 30 s, 72°C for 30-45 s) and  
139 concluded with 6-10 minutes extension at 72°C. PCR primer sequences table (below) included  
140 primers used for DNA amplification.

141

#### 142 *Replication study – genotyping*

143 For the replication study, genotyping of *SERPINA1* Z allele and *TGFB1* codon 10 polymorphisms  
144 were performed from DNA extracted from peripheral blood leukocytes or lymphoblastoid cell  
145 lines. Genotyping was performed by sequencing from PCR-amplified product. For Z allele  
146 sequencing, PCR was performed in 25 µl reaction volume containing 100 ng genomic DNA, 0.4  
147 µM each forward and reverse primer (see PCR primer sequences table below), 1X buffer (1 mM  
148 (NH<sub>4</sub>)<sub>2</sub>SO<sub>4</sub>, 67 mM Tris-HCl (pH8.8), 0.01% Tween-20, 1.0 mM MgCl<sub>2</sub>, 100 µM dNTP mix, and  
149 0.75 units AmpliTaq DNA Polymerase (Perkin Elmer). PCR conditions comprised of initial  
150 denaturation at 94°C for 5 minutes followed by 35 amplification cycles 94°C for 60 s, 58.5°C for  
151 30 s, 72°C for 30 s and concluded with 10 minutes extension at 72°C. The purified PCR products  
152 were sequenced using 'Big Dye' and run on ABI PRISM 3100 or 3130 according to the  
153 manufacturer's protocol (Applied Biosystems).

154 For *TGFB1* codon 10 sequencing, PCR was performed in 25 µl reaction volume  
 155 containing 100 ng genomic DNA, 0.4 µM each forward and reverse primer (see PCR primer  
 156 sequences table below), 1X buffer (1 mM (NH<sub>4</sub>)<sub>2</sub>SO<sub>4</sub>, 67 mM Tris-HCl (pH8.8), 0.01% Tween-20,  
 157 1.0 mM MgCl<sub>2</sub>, 100 µM dNTP mix, 5% DMSO and 1.25 units AmpliTaq DNA polymerase. PCR  
 158 conditions comprised of initial denaturation at 94°C for 5 minutes followed by 35 amplification  
 159 cycles 94°C for 30 s, 55°C for 30 s, 72°C for 45 s and concluded with 5 minutes extension at  
 160 72°C. The purified PCR products were sequenced using 'Big Dye' and run on ABI PRISM 3100  
 161 or 3130 according to the manufacturer's protocol (Applied Biosystems).

162 PCR primer sequences table

|                                      |                                                    |
|--------------------------------------|----------------------------------------------------|
| <i>ACE</i> I/D Forward               | CTG GAG ACC ACT CCC ATC CTT TCT                    |
| <i>ACE</i> I/D Reverse               | GAT GTG GCC ATC ACA TTC GTC AGA                    |
| <i>α1AP</i> Z Allele Forward         | CGA TGC TCT TCC CTG TTC TGA                        |
| <i>α1AP</i> Z Allele Reverse         | GAG GGG AGA CTT GGT ATT TTG TTC                    |
| <i>α1AP</i> S Allele Forward         | TAA CAT CCA GCA CTG TAA GAA G                      |
| <i>α1AP</i> S Allele Reverse         | GGT TCA CCC TCC TCA GCC C                          |
| <i>TGFβ1</i> Promoter Forward        | ATT GGG GAC AGT AAA TGT ATG GGG T                  |
| <i>TGFβ1</i> Promoter Reverse        | AGG ACC AGG CGG AGA AGG CT                         |
| <i>TGFβ1</i> Codon 10 and 25 Forward | TGT AAA ACG ACG GCC AGT GGG ATA CTG AGA CAC CCC CG |
| <i>TGFβ1</i> Codon 10 and 25 Reverse | CGG GTG ACC TCC TTG GCG TAG                        |

163

164 **Statistical analysis**

165 **Stratified Fisher's exact T tests**

166 Stratified association analyses were performed using Fisher's exact tests to assess the effects of  
 167 genotype separately in men and women. Given the potential concern of population stratification,  
 168 we additionally performed Fisher's exact tests restricted to Caucasian subjects in the initial,  
 169 replication and combined datasets. All tests of association were performed using S.A.S. (version  
 170 9.1.3, Cary, NC).

171

172 **Description of covariate adjustment in logistic regression models**

173 We performed multivariable logistic regression models with variable levels of covariate  
 174 adjustment for ethnicity, gender, *CFTR* genotype and *TGFB1* codon 10 genotype. Ethnicity was  
 175 treated as a class variable with five levels, defined by subjects of Caucasian, African, Hispanic,  
 176 Asian or mixed descent. *CFTR* and *TGFB1* codon 10 genotypes were each scored as a three-

177 level class variable. *CFTR* genotype was scored for the number of DF508 mutations (0, 1 or 2)  
178 the subject carried. *TGFB1* codon 10 genotype was scored for the number of copies of the minor  
179 allele (0, 1 or 2) the subject carried.

180

### 181 **Population attributable risk**

182 We estimated the population attributable risk percentage (PAR%) of CFLD associated with  
183 exposure to the *SERPINA1* Z allele risk (heterozygous) genotype using a modification of Levin's  
184 formula.<sup>10,11</sup> The observed absence of homozygotes for the minor (Z) allele in both our CFLD  
185 cases and controls at the *SERPINA1* Z locus facilitates the application of Levin's formula, which  
186 assumes a dichotomous exposure variable. Our study, a retrospective case-control study on  
187 CFLD, does not measure disease prevalence. However, Levin and others have shown that the  
188 population attributable risk may be estimated from a retrospective case-control study, provided  
189 the disease prevalence is low, which ensures that the rate of exposure to the risk genotype is  
190 similar in the control population and the general CF population. The total incidence of CFLD  
191 among CF patients is estimated to be approximately 3-5%<sup>12</sup> and we have demonstrated (see  
192 **Figure 1**) that the rate of the risk genotype at the *SERPINA1* Z locus is similar in our controls to  
193 the general population (and therefore expected to be similar to the general CF population).  
194 Applying the formula of Levin and Bertell (1978)<sup>11</sup> to estimate the population attributable risk, we  
195 have:  $PAR\% = (\Pr(AG|case) - \Pr(AG|control)) / (1 - \Pr(AG|control)) \times 100$ , where AG represents  
196 the risk (heterozygous) genotype at the *a1AP* Z locus. We obtain an estimated PAR% of 6.7%  
197 when using all subjects (initial plus replication samples) and 6.6% when using all Caucasian  
198 subjects only.

199



200 **SUPPLEMENTAL - RESULTS**

201 **Genetic tests for association of *TGFB1* variants in the initial and replication studies**

202 There was some evidence (uncorrected  $p < 0.05$ ) for an association between CFLD and *TGFB1*  
203 (SNPs -509 and Codon 10) in the initial total population, but there was no significant evidence in  
204 only Caucasian subjects in the initial population. In the replication and combined populations,  
205 there was no association of the *TGFB1* codon 10 variant with CFLD. This lack of association  
206 could not be explained by variation in CFTR genotypes (data not shown; eTables 4-5).

207

208 **Age of diagnosis of CFLD**

209 The age of diagnosis of CFLD in male subjects (8.5 years) was significantly earlier ( $P=0.007$ )  
210 than in female subjects (10.5 years). Similarly, in self-reported Caucasians, males were  
211 diagnosed significantly earlier ( $P=0.027$ ) than in females (males=9.7 years, females=11.5 years).

212

213

214 **SUPPLEMENTAL – DISCUSSION**

215 **Clinical implications of a rare allele with high penetrance**

216 The estimated population attributable risk for CF liver disease is 6.7% for the relatively rare  
217 *SERPINA1* Z allele. A similar population attributable risk might be obtained for a common SNP  
218 with a much weaker effect, such as is typically identified in genome wide studies of complex  
219 genetic diseases. From a clinical perspective, a rare variant with large penetrance (such as the Z  
220 allele) may be more useful, as it is now relatively easy and inexpensive to screen for genetic  
221 polymorphisms. Further, given the substantial increased risk associated for carriers of the  
222 *SERPINA1* Z allele, a clinician might be more inclined to seek and use this information.

223

224 **SUPPLEMENTAL REFERENCES**

- 225
- 226 1. Drumm ML, Konstan MW, Schluchter MD, et al. Genetic modifiers of lung disease in cystic  
227 fibrosis. *N Engl J Med.* 2005;353(14):1443-1453.
- 228 2. Sambrook J, Fritsch EF, Maniatis T. *Molecular Cloning: A Laboratory Manual.* 2nd ed. Cold  
229 Spring Harbor: Cold Spring Harbor Laboratory Press, 1989.
- 230 3. Tazelaar JP, Friedman KJ, Kline RS, Guthrie ML, Farber RA. Detection of alpha 1-  
231 antitrypsin Z and S mutations by polymerase chain reaction-mediated site-directed  
232 mutagenesis. *Clin Chem.* 1992;38(8 Pt 1):1486-1488.
- 233 4. Crosdale DJ, Ollier WE, Thomson W, et al. Mannose binding lectin (MBL) genotype  
234 distributions with relation to serum levels in UK Caucasoids. *Eur J Immunogenet.*  
235 2000;27(3):111-117.
- 236 5. Oliphant A, Barker DL, Stuelpnagel JR, Chee MS. BeadArray technology: enabling an  
237 accurate, cost-effective approach to high-throughput genotyping. *Biotechniques.*  
238 2002;Suppl:56-1.
- 239 6. Fan JB, Oliphant A, Shen R, et al. Highly parallel SNP genotyping. *Cold Spring Harb Symp*  
240 *Quant Biol.* 2003;68:69-78.
- 241 7. Ashavaid TF, Shalia KK, Nair KG, Dalal JJ. ACE and AT1R gene polymorphisms and  
242 hypertension in Indian population. *J Clin Lab Anal.* 2000;14(5):230-237.
- 243 8. Yim JJ, Park GY, Lee CT, et al. Genetic susceptibility to chronic obstructive pulmonary  
244 disease in Koreans: combined analysis of polymorphic genotypes for microsomal epoxide  
245 hydrolase and glutathione S-transferase M1 and T1. *Thorax.* 2000;55(2):121-125.
- 246 9. Wilson AG, di Giovine FS, Blakemore AI, Duff GW. Single base polymorphism in the  
247 human tumour necrosis factor alpha (TNF alpha) gene detectable by NcoI restriction of  
248 PCR product. *Hum Mol Genet.* 1992;1(5):353.
- 249 10. Levin ML. The occurrence of lung cancer in man. *Acta Unio Int Contra Cancrum.*  
250 1953;9(3):531-541.
- 251 11. Levin ML, Bertell R. RE: "simple estimation of population attributable risk from case-control  
252 studies". *Am J Epidemiol.* 1978;108(1):78-79.

- 253 **12.** Welsh MJ, Ramsey BW, Accurso FJ, Cutting GR. Cystic Fibrosis. In: Scriver CR, Beaudet  
254 AL, Sly WS, Valle D, eds. *The metabolic and molecular bases of inherited disease. 8th ed.*  
255 New York: McGraw-Hill; 2001:5121-5188.  
256

257 **SUPPLEMENTAL FIGURE LEGENDS**

258 **eFigure 1: Age of liver disease diagnosis in CFLD subjects.** Age distribution of diagnosis of  
259 liver disease (portal hypertension) in all patients with CFLD. Only 7 patients with CFLD had the  
260 diagnosis of portal hypertension made after the age of 30 yrs. These patients were excluded  
261 from the study population and the final analysis, due to being outliers ( $\geq 4SD$  from the mean) of  
262 the normal distribution.

263

264 **eFigure 2: Accumulation of SERPINA1 ( $\alpha 1AP$ ) protein in a CFLD subject with and without**  
265 **the Z allele.** Histological sections from two CF subjects (homozygous for DF508 CFTR) with  
266 cirrhosis and portal hypertension (x300). Top panels:  $\alpha 1$ -antiprotease ( $\alpha 1AP$ , SERPINA1) MZ  
267 heterozygote, Bottom panels: SERPINA1 MM homozygote. Histological sections using periodic  
268 acid Schiff, diastase resistant (PAS-D) stain (left top and bottom) show changes consistent with  
269 severe CFLD in both patients, including large droplet fat in hepatocytes, numerous proliferated  
270 ductules, fibrous tissue and low grade cholangitis. However, tissue from the MZ subject, shows  
271 accumulation of PAS-D positive droplets within hepatocytes adjoining the fibrotic interface (left  
272 top), which are not observed in the MM subject with CFLD (left bottom). Immunoperoxidase stain  
273 using an antibody against SERPINA1, shows positive staining in the same area as the PAS-D  
274 positive droplets in tissue from the MZ subjects (middle top), which is not observed in the MM  
275 subject (middle bottom). It is clear that the positive stain for SERPINA1 is within hepatocytes of  
276 the MZ tissue and not sinusoidal lining cells or macrophages, which show positive CD68 staining  
277 for macrophages (right top and bottom).

278



283  
284  
285  
286

**eTable 2.** Initial study: Prevalence of polymorphic genotypes according to CF patients with (CFLD) and without (no CFLD) liver disease, including by gender

| Gene     | Variant               | SNP rs#  | Status of liver disease | Geno-type | Patients with genotype |      | Geno-type | Patients with genotype |      | Geno-type | Patients with genotype |      | Number of patients | P value*             |
|----------|-----------------------|----------|-------------------------|-----------|------------------------|------|-----------|------------------------|------|-----------|------------------------|------|--------------------|----------------------|
|          |                       |          |                         |           | #                      | %    |           | #                      | %    |           | #                      | %    |                    |                      |
| SERPINA1 | S allele (T2313A)     | 17580    | CFLD                    | AA        | 90                     | 88.2 | AT        | 12                     | 11.8 | TT        | 0                      | 0.0  | 102                | 0.28                 |
|          |                       |          | Male                    |           | 65                     | 87.8 |           | 9                      | 12.2 |           | 0                      | 0.0  | 74                 | 0.26                 |
|          |                       |          | Female                  |           | 25                     | 89.3 |           | 3                      | 10.7 |           | 0                      | 0.0  | 28                 | 0.47                 |
|          |                       |          | no CFLD                 | AA        | 619                    | 92.6 | AT        | 49                     | 7.3  | TT        | 1                      | 0.1  | 669                |                      |
|          |                       |          | no CFLD male            |           | 331                    | 91.9 |           | 29                     | 8.1  |           | 0                      | 0.0  | 360                |                      |
|          |                       |          | no CFLD female          |           | 288                    | 93.2 |           | 20                     | 6.5  |           | 1                      | 0.3  | 309                |                      |
|          | Z allele (G4627A)     | 28929474 | CFLD                    | GG        | 110                    | 88.7 | AG        | 14                     | 11.3 | AA        | 0                      | 0.0  | 124                | 6.5x10 <sup>-5</sup> |
|          |                       |          | Male                    |           | 82                     | 93.2 |           | 6                      | 6.8  |           | 0                      | 0.0  | 88                 | 0.04                 |
|          |                       |          | Female                  |           | 28                     | 77.8 |           | 8                      | 22.2 |           | 0                      | 0.0  | 36                 | 6.1x10 <sup>-5</sup> |
|          |                       |          | no CFLD                 | GG        | 741                    | 97.4 | AG        | 20                     | 2.6  | AA        | 0                      | 0.0  | 761                |                      |
|          |                       |          | no CFLD male            |           | 403                    | 97.6 |           | 10                     | 2.4  |           | 0                      | 0.0  | 413                |                      |
|          |                       |          | no CFLD female          |           | 338                    | 97.1 |           | 10                     | 2.9  |           | 0                      | 0.0  | 348                |                      |
| ACE      | D/I deletion (T2313A) | N/A      | CFLD                    | DD        | 43                     | 35.0 | DI        | 54                     | 43.9 | II        | 26                     | 21.1 | 123                | 0.69                 |
|          |                       |          | Male                    |           | 30                     | 34.5 |           | 36                     | 41.4 |           | 21                     | 24.1 | 87                 | 0.47                 |
|          |                       |          | Female                  |           | 13                     | 36.1 |           | 18                     | 50.0 |           | 5                      | 13.9 | 36                 | 0.94                 |
|          |                       |          | no CFLD                 | DD        | 250                    | 37.3 | DI        | 300                    | 44.7 | II        | 121                    | 18.0 | 671                |                      |
|          |                       |          | no CFLD male            |           | 144                    | 39.9 |           | 149                    | 41.3 |           | 68                     | 18.8 | 361                |                      |
|          |                       |          | no CFLD female          |           | 106                    | 34.2 |           | 151                    | 48.7 |           | 53                     | 17.1 | 310                |                      |
| GSTP1    | (A1375G)              | 947894   | CFLD                    | AA        | 40                     | 41.7 | AG        | 41                     | 42.7 | GG        | 15                     | 15.6 | 96                 | 0.33                 |
|          |                       |          | Male                    |           | 31                     | 44.9 |           | 28                     | 40.6 |           | 10                     | 14.5 | 69                 | 0.73                 |
|          |                       |          | Female                  |           | 9                      | 33.3 |           | 13                     | 48.2 |           | 5                      | 18.5 | 27                 | 0.23                 |
|          |                       |          | no CFLD                 | AA        | 316                    | 43.7 | AG        | 331                    | 45.8 | GG        | 76                     | 10.5 | 723                |                      |
|          |                       |          | no CFLD male            |           | 171                    | 43.8 |           | 173                    | 44.4 |           | 46                     | 11.8 | 390                |                      |
|          |                       |          | no CFLD female          |           | 145                    | 43.5 |           | 158                    | 47.5 |           | 30                     | 9.0  | 333                |                      |

|              |                   |         |                |       |     |      |      |     |      |     |     |      |     |      |
|--------------|-------------------|---------|----------------|-------|-----|------|------|-----|------|-----|-----|------|-----|------|
| <b>MBL2</b>  | O                 | N/A     | CFLD           | AA    | 69  | 59.0 | AO   | 42  | 35.9 | OO  | 6   | 5.1  | 117 | 0.91 |
|              |                   |         | Male           |       | 47  | 56.6 |      | 32  | 38.6 |     | 4   | 4.8  | 83  | 0.84 |
|              |                   |         | Female         |       | 22  | 64.7 |      | 10  | 29.4 |     | 2   | 5.9  | 34  | 0.76 |
|              |                   |         | no CFLD        | AA    | 384 | 57.9 | AO   | 248 | 37.4 | OO  | 31  | 4.7  | 663 |      |
|              |                   |         | no CFLD male   |       | 207 | 57.9 |      | 138 | 38.5 |     | 13  | 3.6  | 358 |      |
|              |                   |         | no CFLD female |       | 177 | 58.0 |      | 110 | 36.1 |     | 18  | 5.9  | 305 |      |
|              | XA/O              | N/A     | CFLD           | Other | 95  | 82.6 | XA/O | 14  | 12.2 | O/O | 6   | 5.2  | 115 | 0.63 |
|              |                   |         | Male           |       | 67  | 81.7 |      | 11  | 13.4 |     | 4   | 4.9  | 82  | 0.71 |
|              |                   |         | Female         |       | 28  | 84.8 |      | 3   | 9.1  |     | 2   | 6.1  | 33  | 0.85 |
|              |                   |         | no CFLD        | Other | 567 | 85.5 | XA/O | 65  | 9.8  | O/O | 31  | 4.7  | 663 |      |
|              |                   |         | no CFLD male   |       | 303 | 84.7 |      | 42  | 11.7 |     | 13  | 3.6  | 358 |      |
|              |                   |         | no CFLD female |       | 264 | 86.6 |      | 23  | 7.5  |     | 18  | 5.9  | 305 |      |
| <b>TGFB1</b> | Promoter (C-509T) | 1800469 | CFLD           | CC    | 44  | 39.6 | CT   | 52  | 46.9 | TT  | 15  | 13.5 | 111 | 0.04 |
|              |                   |         | Male           |       | 34  | 42.5 |      | 35  | 43.7 |     | 11  | 13.8 | 80  | 0.14 |
|              |                   |         | Female         |       | 10  | 32.3 |      | 17  | 54.8 |     | 4   | 12.9 | 31  | 0.14 |
|              |                   |         | no CFLD        | CC    | 413 | 49.6 | CT   | 356 | 42.7 | TT  | 64  | 7.7  | 833 |      |
|              |                   |         | no CFLD male   |       | 225 | 49.4 |      | 198 | 43.4 |     | 33  | 7.2  | 456 |      |
|              |                   |         | no CFLD female |       | 188 | 49.9 |      | 158 | 41.9 |     | 31  | 8.2  | 377 |      |
|              | Codon 10 (C29T)   | 1800470 | CFLD           | TT    | 33  | 29.5 | CT   | 54  | 48.2 | CC  | 25  | 22.3 | 112 | 0.01 |
|              |                   |         | Male           |       | 26  | 32.1 |      | 36  | 44.4 |     | 19  | 23.5 | 81  | 0.04 |
|              |                   |         | Female         |       | 7   | 22.6 |      | 18  | 58.0 |     | 6   | 19.4 | 31  | 0.09 |
|              |                   |         | no CFLD        | TT    | 343 | 40.7 | CT   | 390 | 46.4 | CC  | 109 | 12.9 | 842 |      |
|              |                   |         | no CFLD male   |       | 186 | 40.3 |      | 216 | 46.9 |     | 59  | 12.8 | 461 |      |
|              |                   |         | no CFLD female |       | 157 | 41.2 |      | 174 | 45.7 |     | 50  | 13.1 | 381 |      |
|              | Codon 25 (G74C)   | 1800471 | CFLD           | GG    | 93  | 83.8 | GC   | 18  | 16.2 | CC  | 0   | 0.0  | 111 | 0.61 |
|              |                   |         | Male           |       | 67  | 82.7 |      | 14  | 17.3 |     | 0   | 0.0  | 81  | 0.66 |
|              |                   |         | Female         |       | 26  | 86.7 |      | 4   | 13.3 |     | 0   | 0.0  | 30  | 0.83 |
|              |                   |         | no CFLD        | GG    | 592 | 85.9 | GC   | 92  | 13.4 | CC  | 5   | 0.7  | 689 |      |
|              |                   |         | no CFLD male   |       | 318 | 85.3 |      | 53  | 14.2 |     | 2   | 0.5  | 373 |      |
|              |                   |         | no CFLD female |       | 274 | 86.8 |      | 39  | 12.3 |     | 3   | 0.9  | 316 |      |

\* All P values were calculated with the use of Fisher's exact test of comparisons of the genotypes.



289  
290  
291  
292

**eTable 3.** Initial study - Caucasians: Prevalence of polymorphic genotypes according to CF patients with (CFLD) and without (no CFLD) liver disease, including by gender

| Gene     | Variant               | SNP rs#  | Status of liver disease | Geno-type | Patients with genotype |      | Geno-type | Patients with genotype |      | Geno-type | Patients with genotype |      | Number of patients | P value*             |
|----------|-----------------------|----------|-------------------------|-----------|------------------------|------|-----------|------------------------|------|-----------|------------------------|------|--------------------|----------------------|
|          |                       |          |                         |           | #                      | %    |           | #                      | %    |           | #                      | %    |                    |                      |
| SERPINA1 | S allele (T2313A)     | 17580    | CFLD                    | AA        | 81                     | 89.0 | AT        | 10                     | 11.0 | TT        | 0                      | 0.0  | 91                 | 0.31                 |
|          |                       |          | Male                    |           | 60                     | 89.6 |           | 7                      | 10.4 |           | 0                      | 0.0  | 67                 | 0.48                 |
|          |                       |          | Female                  |           | 21                     | 87.5 |           | 3                      | 12.5 |           | 0                      | 0.0  | 24                 | 0.28                 |
|          |                       |          | no CFLD                 | AA        | 605                    | 92.5 | AT        | 48                     | 7.3  | TT        | 1                      | 0.2  | 654                |                      |
|          |                       |          | no CFLD male            |           | 326                    | 91.8 |           | 29                     | 8.2  |           | 0                      | 0.0  | 355                |                      |
|          |                       |          | no CFLD female          |           | 279                    | 93.3 |           | 19                     | 6.4  |           | 1                      | 0.3  | 299                |                      |
|          | Z allele (G4627A)     | 28929474 | CFLD                    | GG        | 100                    | 90.1 | AG        | 11                     | 9.9  | AA        | 0                      | 0.0  | 111                | 6.9x10 <sup>-4</sup> |
|          |                       |          | Male                    |           | 76                     | 95.0 |           | 4                      | 5.0  |           | 0                      | 0.0  | 80                 | 0.26                 |
|          |                       |          | Female                  |           | 24                     | 77.4 |           | 7                      | 22.6 |           | 0                      | 0.0  | 31                 | 1.0x10 <sup>-4</sup> |
|          |                       |          | no CFLD                 | GG        | 726                    | 97.4 | AG        | 19                     | 2.6  | AA        | 0                      | 0.0  | 745                |                      |
|          |                       |          | no CFLD male            |           | 397                    | 97.5 |           | 10                     | 2.5  |           | 0                      | 0.0  | 407                |                      |
|          |                       |          | no CFLD female          |           | 329                    | 97.3 |           | 9                      | 2.7  |           | 0                      | 0.0  | 338                |                      |
| ACE      | D/I deletion (T2313A) | N/A      | CFLD                    | DD        | 38                     | 34.2 | DI        | 49                     | 44.2 | II        | 24                     | 21.6 | 111                | 0.61                 |
|          |                       |          | Male                    |           | 27                     | 33.8 |           | 34                     | 42.4 |           | 19                     | 23.8 | 80                 | 0.48                 |
|          |                       |          | Female                  |           | 11                     | 35.5 |           | 15                     | 48.4 |           | 5                      | 16.1 | 31                 | 0.97                 |
|          |                       |          | no CFLD                 | DD        | 243                    | 37.0 | DI        | 296                    | 45.2 | II        | 117                    | 17.8 | 656                |                      |
|          |                       |          | no CFLD male            |           | 142                    | 39.9 |           | 147                    | 41.3 |           | 67                     | 18.8 | 356                |                      |
|          |                       |          | no CFLD female          |           | 101                    | 33.7 |           | 149                    | 49.6 |           | 50                     | 16.7 | 300                |                      |
| GSTP1    | (A1375G)              | 947894   | CFLD                    | AA        | 35                     | 40.7 | AG        | 37                     | 43.0 | GG        | 14                     | 16.3 | 86                 | 0.24                 |
|          |                       |          | Male                    |           | 28                     | 45.2 |           | 25                     | 40.3 |           | 9                      | 14.5 | 62                 | 0.69                 |
|          |                       |          | Female                  |           | 7                      | 29.2 |           | 12                     | 50.0 |           | 5                      | 20.8 | 24                 | 0.08                 |
|          |                       |          | no CFLD                 | AA        | 309                    | 43.8 | AG        | 325                    | 46.0 | GG        | 72                     | 10.2 | 706                |                      |
|          |                       |          | no CFLD male            |           | 167                    | 43.5 |           | 172                    | 44.8 |           | 45                     | 11.7 | 384                |                      |
|          |                       |          | no CFLD female          |           | 142                    | 44.1 |           | 153                    | 47.5 |           | 27                     | 8.4  | 322                |                      |

|              |                   |         |                |       |     |      |      |     |      |     |     |      |     |      |
|--------------|-------------------|---------|----------------|-------|-----|------|------|-----|------|-----|-----|------|-----|------|
| <b>MBL2</b>  | O                 | N/A     | CFLD           | AA    | 61  | 57.6 | AO   | 40  | 37.7 | OO  | 5   | 4.7  | 106 | 0.95 |
|              |                   |         | Male           |       | 43  | 56.6 |      | 30  | 39.5 |     | 3   | 3.9  | 76  | 0.97 |
|              |                   |         | Female         |       | 18  | 60.0 |      | 10  | 33.3 |     | 2   | 6.7  | 30  | 0.90 |
|              |                   |         | no CFLD        | AA    | 379 | 58.5 | AO   | 240 | 37.0 | OO  | 29  | 4.5  | 648 |      |
|              |                   |         | no CFLD male   |       | 204 | 57.8 |      | 136 | 38.5 |     | 13  | 3.7  | 353 |      |
|              |                   |         | no CFLD female |       | 175 | 59.3 |      | 104 | 35.3 |     | 16  | 5.4  | 295 |      |
|              | XA/O              | N/A     | CFLD           | Other | 86  | 82.7 | XA/O | 13  | 12.5 | O/O | 5   | 4.8  | 104 | 0.58 |
|              |                   |         | Male           |       | 62  | 82.7 |      | 10  | 13.3 |     | 3   | 4.0  | 75  | 0.81 |
|              |                   |         | Female         |       | 24  | 82.8 |      | 3   | 10.3 |     | 2   | 6.9  | 29  | 0.60 |
|              |                   |         | no CFLD        | Other | 557 | 85.9 | XA/O | 62  | 9.6  | O/O | 29  | 4.5  | 648 |      |
|              |                   |         | no CFLD male   |       | 299 | 84.7 |      | 41  | 11.6 |     | 13  | 3.7  | 353 |      |
|              |                   |         | no CFLD female |       | 258 | 87.5 |      | 21  | 7.1  |     | 16  | 5.4  | 295 |      |
| <b>TGFB1</b> | Promoter (C-509T) | 1800469 | CFLD           | CC    | 41  | 41.4 | CT   | 47  | 47.5 | TT  | 11  | 11.1 | 99  | 0.20 |
|              |                   |         | Male           |       | 32  | 44.4 |      | 32  | 44.5 |     | 8   | 11.1 | 72  | 0.41 |
|              |                   |         | Female         |       | 9   | 33.3 |      | 15  | 55.6 |     | 3   | 11.1 | 27  | 0.22 |
|              |                   |         | no CFLD        | CC    | 408 | 50.0 | CT   | 344 | 42.2 | TT  | 64  | 7.8  | 816 |      |
|              |                   |         | no CFLD male   |       | 225 | 50.0 |      | 192 | 42.7 |     | 33  | 7.3  | 450 |      |
|              |                   |         | no CFLD female |       | 183 | 50.0 |      | 152 | 41.5 |     | 31  | 8.5  | 366 |      |
|              | Codon 10 (C29T)   | 1800470 | CFLD           | TT    | 31  | 31.0 | CT   | 49  | 49.0 | CC  | 20  | 20.0 | 100 | 0.06 |
|              |                   |         | Male           |       | 24  | 32.9 |      | 34  | 46.6 |     | 15  | 20.5 | 73  | 0.17 |
|              |                   |         | Female         |       | 7   | 25.9 |      | 15  | 55.6 |     | 5   | 18.5 | 27  | 0.24 |
|              |                   |         | no CFLD        | TT    | 339 | 41.1 | CT   | 378 | 45.8 | CC  | 108 | 13.1 | 825 |      |
|              |                   |         | no CFLD male   |       | 186 | 40.9 |      | 210 | 46.1 |     | 59  | 13.0 | 455 |      |
|              |                   |         | no CFLD female |       | 153 | 41.4 |      | 168 | 45.4 |     | 49  | 13.2 | 370 |      |
|              | Codon 25 (G74C)   | 1800471 | CFLD           | GG    | 84  | 84.8 | GC   | 15  | 15.2 | CC  | 0   | 0.0  | 99  | 0.82 |
|              |                   |         | Male           |       | 60  | 82.2 |      | 13  | 17.8 |     | 0   | 0.0  | 73  | 0.63 |
|              |                   |         | Female         |       | 24  | 92.3 |      | 2   | 7.7  |     | 0   | 0.0  | 26  | 0.81 |
|              |                   |         | no CFLD        | GG    | 579 | 85.9 | GC   | 90  | 13.4 | CC  | 5   | 0.7  | 674 |      |
|              |                   |         | no CFLD male   |       | 313 | 85.1 |      | 53  | 14.4 |     | 2   | 0.5  | 368 |      |
|              |                   |         | no CFLD female |       | 266 | 86.9 |      | 37  | 12.1 |     | 3   | 1.0  | 306 |      |

\* All P values were calculated with the use of Fisher's exact test of comparisons of the genotypes.

**eTable 4.** Replication & combined studies: Prevalence of polymorphic genotypes according to CF patients with (CFLD) and without

| Gene     | Study             | Variant           | SNP rs#  | Status of liver disease | Geno-type | Patients with genotype |      | Geno-type | Patients with genotype |      | Geno-type | Patients with genotype |      | Number of patients | P value*             |
|----------|-------------------|-------------------|----------|-------------------------|-----------|------------------------|------|-----------|------------------------|------|-----------|------------------------|------|--------------------|----------------------|
|          |                   |                   |          |                         |           | #                      | %    |           | #                      | %    |           | #                      | %    |                    |                      |
| SERPINA1 | Replication study | Z allele (G4627A) | 28929474 | CFLD                    | GG        | 127                    | 93.4 | AG        | 9                      | 6.6  | AA        | 0                      | 0.0  | 136                | 0.005                |
|          |                   |                   |          | Male                    |           | 75                     | 91.5 |           | 7                      | 8.5  |           | 0                      | 0.0  | 82                 | 0.009                |
|          |                   |                   |          | Female                  |           | 52                     | 96.3 |           | 2                      | 3.7  |           | 0                      | 0.0  | 54                 | 0.25                 |
|          |                   |                   |          | no CFLD                 | GG        | 1062                   | 98.0 | AG        | 22                     | 2.0  | AA        | 0                      | 0.0  | 1084               |                      |
|          |                   |                   |          | no CFLD male            |           | 571                    | 97.6 |           | 14                     | 2.4  |           | 0                      | 0.0  | 585                |                      |
|          |                   |                   |          | no CFLD female          |           | 491                    | 98.4 |           | 8                      | 1.6  |           | 0                      | 0.0  | 499                |                      |
|          | Combined studies  | Z allele (G4627A) | 28929474 | CFLD                    | GG        | 237                    | 91.2 | AG        | 23                     | 8.8  | AA        | 0                      | 0.0  | 260                | 9.3x10 <sup>-7</sup> |
|          |                   |                   |          | Male                    |           | 157                    | 92.4 |           | 13                     | 7.6  |           | 0                      | 0.0  | 170                | 1.2x10 <sup>-3</sup> |
|          |                   |                   |          | Female                  |           | 80                     | 88.9 |           | 10                     | 11.1 |           | 0                      | 0.0  | 90                 | 1.3x10 <sup>-4</sup> |
|          |                   |                   |          | no CFLD                 | GG        | 1803                   | 97.7 | AG        | 42                     | 2.3  | AA        | 0                      | 0.0  | 1845               |                      |
|          |                   |                   |          | no CFLD male            |           | 974                    | 97.6 |           | 24                     | 2.4  |           | 0                      | 0.0  | 998                |                      |
|          |                   |                   |          | no CFLD female          |           | 829                    | 97.9 |           | 18                     | 2.1  |           | 0                      | 0.0  | 847                |                      |
| TGFB1    | Replication study | Codon 10 (C29T)   | 1800470  | CFLD                    | TT        | 51                     | 38.1 | CT        | 62                     | 46.2 | CC        | 21                     | 15.7 | 134                | 1.00                 |
|          |                   |                   |          | Male                    |           | 32                     | 39.5 |           | 37                     | 45.7 |           | 12                     | 14.8 | 81                 | 0.99                 |
|          |                   |                   |          | Female                  |           | 19                     | 35.8 |           | 25                     | 47.2 |           | 9                      | 17.0 | 53                 | 0.98                 |
|          |                   |                   |          | no CFLD                 | TT        | 290                    | 38.3 | CT        | 349                    | 46.1 | CC        | 118                    | 15.6 | 757                |                      |
|          |                   |                   |          | no CFLD male            |           | 171                    | 40.7 |           | 186                    | 44.3 |           | 63                     | 15.0 | 420                |                      |
|          |                   |                   |          | no CFLD female          |           | 119                    | 35.3 |           | 163                    | 48.4 |           | 55                     | 16.3 | 337                |                      |
|          | Combined studies  | Codon 10 (C29T)   | 1800470  | CFLD                    | TT        | 84                     | 34.1 | CT        | 116                    | 47.2 | CC        | 46                     | 18.7 | 246                | 0.10                 |
|          |                   |                   |          | Male                    |           | 58                     | 35.8 |           | 73                     | 45.1 |           | 31                     | 19.1 | 162                | 0.19                 |
|          |                   |                   |          | Female                  |           | 26                     | 31.0 |           | 43                     | 51.1 |           | 15                     | 17.9 | 84                 | 0.37                 |
|          |                   |                   |          | no CFLD                 | TT        | 633                    | 39.6 | CT        | 739                    | 46.2 | CC        | 227                    | 14.2 | 1599               |                      |
|          |                   |                   |          | no CFLD male            |           | 357                    | 40.5 |           | 402                    | 45.7 |           | 122                    | 13.8 | 881                |                      |
|          |                   |                   |          | no CFLD female          |           | 276                    | 38.4 |           | 337                    | 47.0 |           | 105                    | 14.6 | 718                |                      |

\* All P values were calculated with the use of Fisher's exact test of comparisons of the genotypes.

**eTable 5.** Replication & combined studies - Caucasians: Prevalence of polymorphic genotypes according to CF patients with (CFLD) and without (no CFLD) liver disease, including by gender

| Gene     | Study             | Variant           | SNP rs#  | Status of liver disease | Geno-type | Patients with genotype |      | Geno-type | Patients with genotype |      | Geno-type | Patients with genotype |      | Number of patients | P value*             |
|----------|-------------------|-------------------|----------|-------------------------|-----------|------------------------|------|-----------|------------------------|------|-----------|------------------------|------|--------------------|----------------------|
|          |                   |                   |          |                         |           | #                      | %    |           | #                      | %    |           | #                      | %    |                    |                      |
| SERPINA1 | Replication study | Z allele (G4627A) | 28929474 | CFLD                    | GG        | 109                    | 92.4 | AG        | 9                      | 7.6  | AA        | 0                      | 0.0  | 118                | 2.2x10 <sup>-3</sup> |
|          |                   |                   |          | Male                    |           | 68                     | 90.7 |           | 7                      | 9.3  |           | 0                      | 0.0  | 75                 | 6.5x10 <sup>-3</sup> |
|          |                   |                   |          | Female                  |           | 41                     | 95.3 |           | 2                      | 4.7  |           | 0                      | 0.0  | 43                 | 0.19                 |
|          |                   |                   |          | no CFLD                 | GG        | 1040                   | 97.9 | AG        | 22                     | 2.1  | AA        | 0                      | 0.0  | 1062               |                      |
|          |                   |                   |          | no CFLD male            |           | 558                    | 97.6 |           | 14                     | 2.4  |           | 0                      | 0.0  | 572                |                      |
|          |                   |                   |          | no CFLD female          |           | 482                    | 98.4 |           | 8                      | 1.6  |           | 0                      | 0.0  | 490                |                      |
|          | Combined studies  | Z allele (G4627A) | 28929474 | CFLD                    | GG        | 209                    | 91.3 | AG        | 20                     | 8.7  | AA        | 0                      | 0.0  | 229                | 4.2x10 <sup>-6</sup> |
|          |                   |                   |          | Male                    |           | 144                    | 92.9 |           | 11                     | 7.1  |           | 0                      | 0.0  | 155                | 4.8x10 <sup>-3</sup> |
|          |                   |                   |          | Female                  |           | 65                     | 87.8 |           | 9                      | 12.2 |           | 0                      | 0.0  | 74                 | 1.0x10 <sup>-4</sup> |
|          |                   |                   |          | no CFLD                 | GG        | 1766                   | 97.7 | AG        | 41                     | 2.3  | AA        | 0                      | 0.0  | 1807               |                      |
|          |                   |                   |          | no CFLD male            |           | 955                    | 97.5 |           | 24                     | 2.5  |           | 0                      | 0.0  | 979                |                      |
|          |                   |                   |          | no CFLD female          |           | 811                    | 97.9 |           | 17                     | 2.1  |           | 0                      | 0.0  | 828                |                      |
| TGFB1    | Replication study | Codon 10 (C29T)   | 1800470  | CFLD                    | TT        | 46                     | 39.7 | CT        | 52                     | 44.8 | CC        | 18                     | 15.5 | 116                | 0.96                 |
|          |                   |                   |          | Male                    |           | 30                     | 40.5 |           | 33                     | 44.6 |           | 11                     | 14.9 | 74                 | 1.00                 |
|          |                   |                   |          | Female                  |           | 16                     | 38.1 |           | 19                     | 45.2 |           | 7                      | 16.7 | 42                 | 0.98                 |
|          |                   |                   |          | no CFLD                 | TT        | 285                    | 38.7 | CT        | 338                    | 45.9 | CC        | 113                    | 15.4 | 736                |                      |
|          |                   |                   |          | no CFLD male            |           | 167                    | 41.0 |           | 181                    | 44.5 |           | 59                     | 14.5 | 407                |                      |
|          |                   |                   |          | no CFLD female          |           | 118                    | 35.9 |           | 157                    | 47.7 |           | 54                     | 16.4 | 329                |                      |
|          | Combined studies  | Codon 10 (C29T)   | 1800470  | CFLD                    | TT        | 77                     | 35.6 | CT        | 101                    | 46.8 | CC        | 38                     | 17.6 | 216                | 0.28                 |
|          |                   |                   |          | Male                    |           | 54                     | 36.7 |           | 67                     | 45.6 |           | 26                     | 17.7 | 147                | 0.36                 |
|          |                   |                   |          | Female                  |           | 23                     | 33.3 |           | 34                     | 49.3 |           | 12                     | 17.4 | 69                 | 0.62                 |
|          |                   |                   |          | no CFLD                 | TT        | 624                    | 40.0 | CT        | 716                    | 45.8 | CC        | 221                    | 14.2 | 1561               |                      |
|          |                   |                   |          | no CFLD male            |           | 353                    | 41.0 |           | 391                    | 45.3 |           | 118                    | 13.7 | 862                |                      |
|          |                   |                   |          | no CFLD female          |           | 271                    | 38.8 |           | 325                    | 46.5 |           | 103                    | 14.7 | 699                |                      |

\* All P values were calculated with the use of Fisher's exact test of comparisons of the genotypes.

300

**eTable 6.** Multivariable logistic regression analysis of SERPINA1 Z allele among patients with CFLD and CF no LD using multiple covariates

|                                                                                                                                                                                                                                                                       | Odds ratio<br>(95% CI) | P value***           |
|-----------------------------------------------------------------------------------------------------------------------------------------------------------------------------------------------------------------------------------------------------------------------|------------------------|----------------------|
| <b>Covariate - ethnicity</b>                                                                                                                                                                                                                                          |                        |                      |
| All Patients (n=2105)                                                                                                                                                                                                                                                 | 4.26 (2.49 - 7.28)     | 1.1x10 <sup>-7</sup> |
| CFLD (n = 260)                                                                                                                                                                                                                                                        |                        |                      |
| CF no LD (n = 1845)*                                                                                                                                                                                                                                                  |                        |                      |
| Caucasians (n=2036)                                                                                                                                                                                                                                                   | 4.12 (2.37 - 7.17)     | 5.3x10 <sup>-7</sup> |
| CFLD (n = 229)                                                                                                                                                                                                                                                        |                        |                      |
| CF no LD (n = 1807)                                                                                                                                                                                                                                                   |                        |                      |
| <b>Covariate - ethnicity, gender, CFTR and TGFB1 codon 10 genotype</b>                                                                                                                                                                                                |                        |                      |
| All Patients (n=1760)**                                                                                                                                                                                                                                               | 4.66 (2.55 - 8.53)     | 5.9x10 <sup>-7</sup> |
| CFLD (n = 246)                                                                                                                                                                                                                                                        |                        |                      |
| CF no LD (n = 1514)                                                                                                                                                                                                                                                   |                        |                      |
| Caucasians (n=1693)                                                                                                                                                                                                                                                   | 4.53 (2.44 - 8.40)     | 1.8x10 <sup>-6</sup> |
| CFLD (n = 216)                                                                                                                                                                                                                                                        |                        |                      |
| CF no LD (n = 1477)                                                                                                                                                                                                                                                   |                        |                      |
| * CFTR genotypes unknown on 86 of the 1931 CF no LD control subjects.<br>** CFTR and/or TGFB1 genotypes unknown on 431 subjects of 2191 complete population.<br>*** All P values were calculated with the use of Fisher's exact test of comparisons of the genotypes. |                        |                      |

301

302 **eFigure 1.** Age of liver disease diagnosis in CFLD subjects

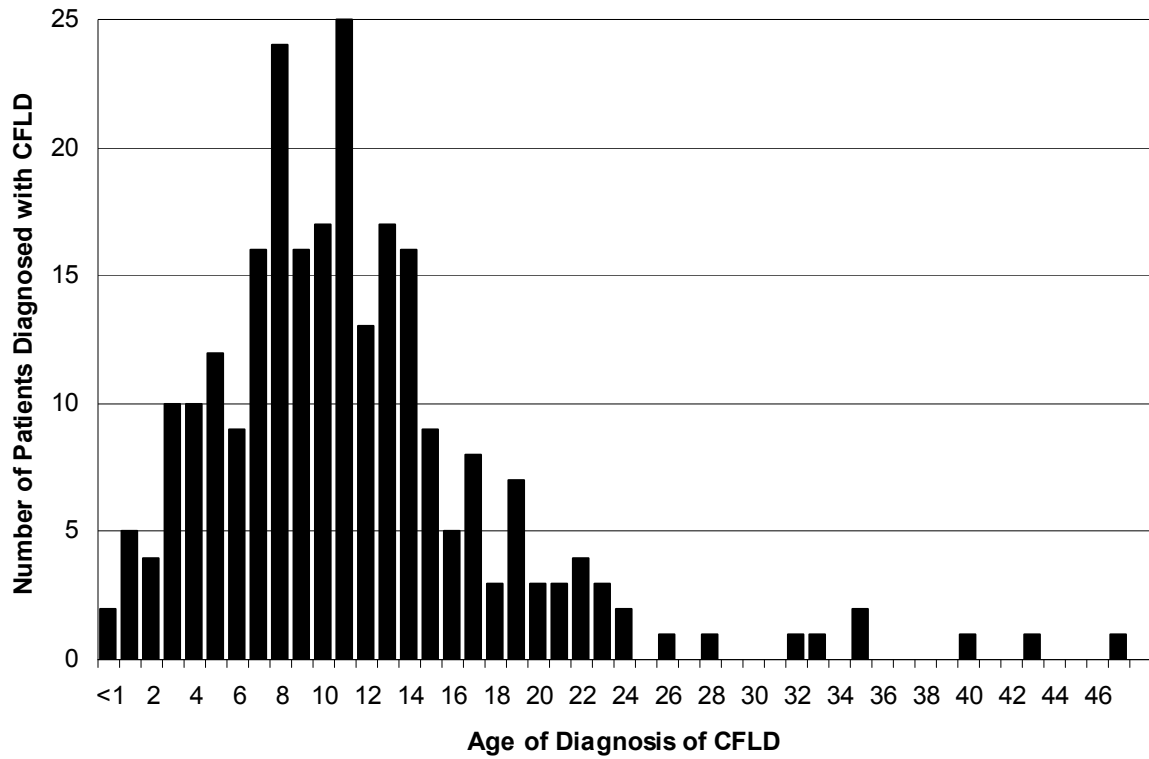

303  
304  
305  
306  
307  
308

309 **eFigure 2.** Accumulation of SERPINA1 ( $\alpha$ 1AP) protein in a CFLD subject with  
310 and without the Z allele  
311  
312

**CFLD subject  
(+ Z allele)**

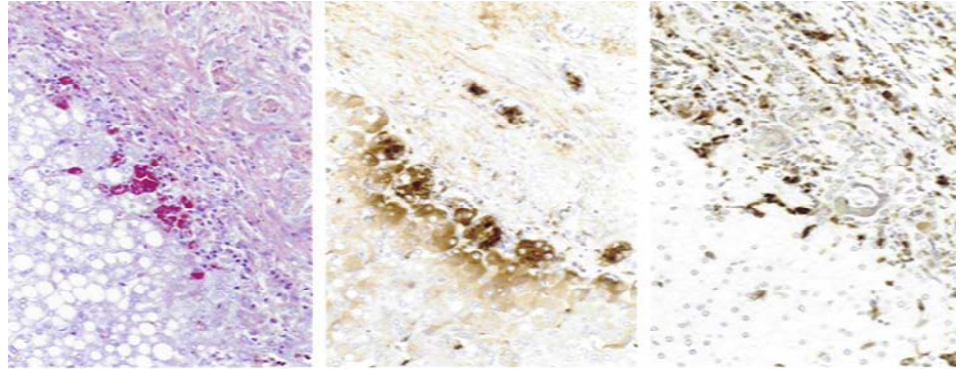

**CFLD subject  
(- Z allele)**

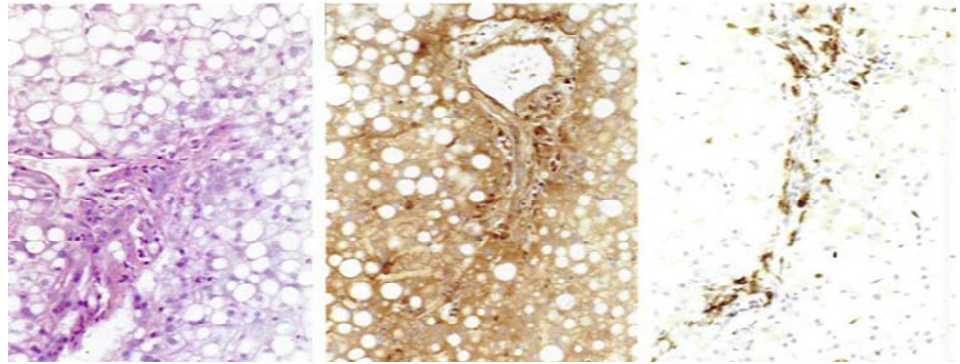

313  
314  
315  
316
